# Supplementary material
Source: publisher site journal article supplement (https://www.degruyterbrill.com/publication/dbid/tjgo/downloadAsset/TJGO_TJGO_Vorwort.pdf)
Supplement: Supplementary file 1 [file TJGO_TJGO_Vorwort.pdf]

# Vorwort

Wozu eine vollständige Edition der Tagebücher des nationalsozialistischen Reichspropagandaministers Joseph Goebbels? Lohnt sich die schier endlose Mühe der Textbeschaffung und der wissenschaftlichen Editionsarbeit, lohnen sich die über viele Jahre hinweg aufgewendeten Mittel? Auch im materiellen Sinne zweckfreie Wissenschaft muß solche Fragen beantworten, selbst wenn darüber letztlich nur die spätere wissenschaftliche Auswertung und Rezeption entscheiden können.

Der tatsächliche Quellenwert ist nicht identisch mit dem bloß punktuellen und kurzfristigen Sensationswert. Die Bedeutung der Tagebücher erschöpft sich auch nicht in der spannungsvollen in diesem Band ausführlich geschilderten Überlieferungsgeschichte und den sich an sie knüpfenden Rechtsstreitigkeiten, obwohl das lebhafte Medienecho zuweilen diesen Eindruck erweckt.

Zweifellos liefert ein so umfangreicher Text auch eine Fülle neuer Einsichten in Detailfragen, in politische Entscheidungsprozesse und in die Herrschaftsstruktur des NS-Regimes, schließlich vielerlei Aufschlüsse über sein Führungspersonal. Von singulärem Wert aber sind die Tagebücher von Goebbels, weil sie das einzige Selbstzeugnis eines nationalsozialistischen Spitzenpolitikers über einen Zeitraum von mehr als zwei Jahrzehnten darstellen und die Frühgeschichte der NSDAP, die nationalsozialistische Beherrschung und die Zerstörung des alten Europa sowie die Deutschland in den Abgrund reißende Katastrophe gleichermaßen umfassen. Die Tagebücher geben Zeugnis darüber, wie Goebbels die Geschichte seiner Zeit sehen wollte – insofern sind sie keine objektive Interpretation dieser Epoche, auch kein mit subjektiver Aufrichtigkeit verfaßtes „Journal intime“. Vielmehr sind diese Tagebücher, deren bloße Masse verblüfft und von der Besessenheit des Verfassers zeugt, Ausdruck der Hybris desjenigen, der dem autosuggestiven Wahn verfallen war, Geschichte machen und ein für allemal schreiben zu können, damit künftige Generationen die Geschichte des 20. Jahrhunderts so sehen, wie sie der Chefpropagandist des Nationalsozialismus gesehen wissen wollte.

In der nüchternen Sprache des Historikers heißt dies: Die Goebbels-Tagebücher müssen nicht allein mit textkritischer Akribie ediert, sondern auch mit dem klassischen quellenkritischen Instrumentarium benutzt und interpretiert werden. Der Subjektivismus, die Verlogenheit und Barbarei des Autors sind also kein Argument gegen den Quellenwert des Textes, sowenig die spätere Veröffentlichungsabsicht des Verfassers die historische Bedeutung dieser „Tagebücher“ vermindert, sondern lediglich die Notwendigkeit der Quellenkritik einmal mehr bestätigt. Sie hat in erstaunlich großem Maße gezeigt, daß Goebbels sich im Hinblick auf die *Faktendarstellung* in der Regel um Korrektheit bemühte.

Bisher lagen ausschließlich Teil- und Auswahlveröffentlichungen der Goebbels-Tagebücher vor, dies konnte angesichts der bis 1992 zugänglichen Quellen nicht anders sein. Alle bisherigen Editionen können redlicherweise auch nur am damaligen Quellenstand gemessen werden. Für bloß publizistische Unternehmungen versteht sich solche Unvoll-

kommenheit von selbst, im Falle wissenschaftlicher Dokumentationen aber bedarf sie der Begründung. Dies gilt insbesondere für die bislang umfangreichste Veröffentlichung, die Publikation der handschriftlichen Tagebücher von 1924 bis 1941, die Elke Fröhlich in vier Bänden 1987 im Auftrag des Instituts für Zeitgeschichte und des Bundesarchivs besorgte. Diese Ausgabe trägt den Untertitel „Sämtliche Fragmente“. Damit wurde schon im Titel auf die Unvollständigkeit der Textgrundlage verwiesen. Der Spiritus rector dieser Ausgabe, mein Amtsvorgänger Martin Broszat, der im Verein mit dem damaligen Präsidenten des Bundesarchivs, Hans Booms, die entscheidenden Initiativen ergriffen und mit der ihn charakterisierenden eigenwilligen Tatkraft die Voraussetzungen für die Publikation geschaffen hatte, stand vor der Entscheidung, ob er auf die Veröffentlichung verzichten oder die unvermeidliche Unvollkommenheit einer solchen, mit verschiedenen unvollständigen, nur teilweise originalen Überlieferungen arbeitenden Ausgabe in Kauf nehmen sollte. Er entschied sich für die zweite Möglichkeit, um der Geschichtswissenschaft die damals zugänglichen Texte als Arbeitsinstrument zur Verfügung zu stellen. Damit wurde ein großer Teil bis dahin unbekannter, außerordentlich schwer zu entziffernder Texte erstmals publiziert, alle späteren Abdrucke fußen darauf, auch wenn sie im Zuge der normalen wissenschaftlichen Kritik zu Verbesserungen beitragen konnten.

Sicher hätte es auch gute Gründe dafür gegeben, angesichts der desolaten Überlieferung auf eine vergleichsweise anspruchsvolle – im Lichte der späteren Erkenntnisse vielleicht zu anspruchsvolle – Publikation überhaupt zu verzichten. Doch sind die getroffenen Entscheidungen ebenfalls sachlich begründbar gewesen und die Gerechtigkeit gebietet es, die damalige Perspektive zu würdigen, die da lautete: lieber eine unvollkommene Publikation als gar keine. Und wer hat zu Beginn der 1980er Jahre, als mit der Vorbereitung begonnen wurde, voraussehen können, daß von 1990 an die Archive der DDR und ab 1992 die russischen Archive zugänglich bzw. zugänglicher werden würden? Wenngleich Elke Fröhlich weiterhin intensive Textrecherchen betrieben und so im Laufe der folgenden Jahre die Textgrundlage für eine Fortführung erheblich erweitert hatte, war doch auch zu Anfang des Jahres 1992 keineswegs klar, ob und in welchem Umfang die Edition der ursprünglichen Planung gemäß fortgesetzt werden konnte. Erst die seit Frühjahr 1992 einsetzende Intensivierung der Recherchen und die damals erfolgte Entdeckung der zeitgenössischen, im Auftrag von Goebbels vom Original angefertigten Glasplattenüberlieferung des Gesamtbestandes durch Elke Fröhlich im ehemaligen Sonderarchiv in Moskau versprachen eine völlig neue Perspektive und eine sinnvolle Fortsetzung der Arbeit. In Verhandlungen, die ich gemeinsam mit dem Leiter des IfZ-Archivs, Werner Röder, in Moskau führte, konnte eine Vereinbarung mit dem damaligen Roskomarchiv erreicht werden, an deren Ende die vollständige Reproduktion des Glasplattenbestandes in Gegenwart zweier Mitarbeiter des IfZ, Elke Fröhlich und Hartmut Mehringer, im Juli 1992 stand. Dieser Bestand befindet sich nun komplett im IfZ und bildet gemeinsam mit anderen Überlieferungen die Textgrundlage. Im August 1992 erklärte sich François Genoud, dem laut Gerichtsbeschuß die Publikationsrechte zustanden, schließlich mit der wissenschaftlichen Edition sämtlicher Tagebuchtexte von Goebbels durch das Institut für Zeitgeschichte einverstanden. Die Erarbeitung neuer, ins Detail gehender Editionsrichtlinien sowie die Betrauung mehrerer Wissenschaftler mit der Bearbeitung einzelner Bände bot die Gewähr für die ebenso sorgfältige wie zügige Edition des gesamten nun zur Verfügung stehenden Textes. Welch außerordentliche Erweiterung

das bedeutet, zeigt allein die Tatsache, daß der nun vollständig und in unbezweifelbarer Textgrundlage vorliegende Teil I 1923 bis 1941 um mehr als ein Drittel umfangreicher ist als die Ausgabe von 1987, hinzu kommen die insgesamt 15 Bände der Diktate 1941 bis 1945.

Die Editionsregeln schreiben u. a. die Ermittlung jeder in den Tagebüchern genannten Person vor. Bei der Bearbeitung der frühen handschriftlichen Tagebücher (Bd. 1-3), in denen sich zahlreiche unbekannte Personen finden, die nur einmal, mitunter auch ohne jeden zusätzlichen Hinweis, genannt werden oder die oft auch keinerlei zeitgeschichtliche Bedeutung erlangt haben, mußte diese Editionsrichtlinie in Anbetracht des Zeit- und Kostenaufwands langwieriger Verifizierungen modifiziert werden.

Das Institut für Zeitgeschichte legt hier nun die beiden letzten Erschließungsbände vor, mit denen die insgesamt 29 (statt 4!) Text- und drei Erschließungsbände umfassende Ausgabe abgeschlossen wird.

Mit dieser nun annähernd vollständigen, auf einer originalen bzw. zweifelsfrei original-äquivalenten Überlieferung beruhenden Edition der Goebbels-Tagebücher führt das Institut für Zeitgeschichte seine langjährigen Bemühungen zuende. Tatsächlich handelt es sich um eine völlig neue Ausgabe, für die bei der Materialbeschaffung die Unterstützung des Staatlichen Archivdienstes Rußlands (Rosarchiv) unentbehrlich war. Ich danke dem damaligen Vorsitzenden des Rosarchivs Rudolf G. Pichoja, seinem Stellvertreter Walerij I. Abramow, dem Leiter der Auslandsabteilung Wladimir P. Tarasow sowie dem vormaligen Direktor des Zentrums für die Aufbewahrung historisch-dokumentarischer Sammlungen (ehemals Sonderarchiv) Wiktor N. Bondarew und seinem Nachfolger Mansur M. Muhamedschanow.

Für mannigfache Unterstützung danke ich auch (dem inzwischen verstorbenen) Lew Besymenskij. Ich danke dem Saur Verlag, insbesondere dem Verleger Klaus G. Saur, dessen großzügiges, nie erlahmendes Entgegenkommen ebenfalls zu den unentbehrlichen Voraussetzungen des Erscheinens zählt. Der damalige Verwaltungsleiter des IfZ Georg Maisinger und seine Nachfolgerin Ingrid Morgen bewiesen wie stets Umsicht und Tatkraft.

Ausschlaggebend für das Gelingen eines solchen Werkes ist selbstverständlich die editorische Arbeit; die wissenschaftlichen Bearbeiter haben deswegen den bedeutendsten Anteil an der Publikation der Goebbels-Tagebücher. Dies gilt in hervorragendem Maße für die Herausgeberin Elke Fröhlich, deren über viele Jahre bewährtem Spürsinn, Sachkunde und stetem Einsatz die Edition Entscheidendes verdankt.

München, im Juli 1993/97/2003/2008

Horst Möller  
Direktor des  
Instituts für Zeitgeschichte
